# Supplementary material for: Nonylphenol induces pancreatic damage in rats through mitochondrial dysfunction and oxidative stress
Source: Royal Society of Chemistry journal article supplement (doi:10.1039/c6tx00450d), 2017-01-01
Supplement: c6tx00450d1.pdf [file c6tx00450d1.pdf]

**S 1. NP long term exposure had no effects on the levels of blood glucose.** There is no difference in blood glucose between untreated and NP treated groups in the 90 consecutive days. (A) The levels of blood glucose were detected monthly. (B) Total RNA was extracted, reverse-transcribed and equal amounts of cDNA were used for qRT-PCR. The mRNA expressions of GLUT2 (B) and IR (C) were evaluated. Results are expressed as mean  $\pm$  SEM ( $n=8$ ) ( $*p < 0.05$  indicated doses of NP treated groups vs. control group).
