# Supplementary figures and images for: Nonylphenol induces pancreatic damage in rats through mitochondrial dysfunction and oxidative stress
Source: Royal Society of Chemistry journal article supplement (doi:10.1039/c6tx00450d), 2017-01-01

S 1

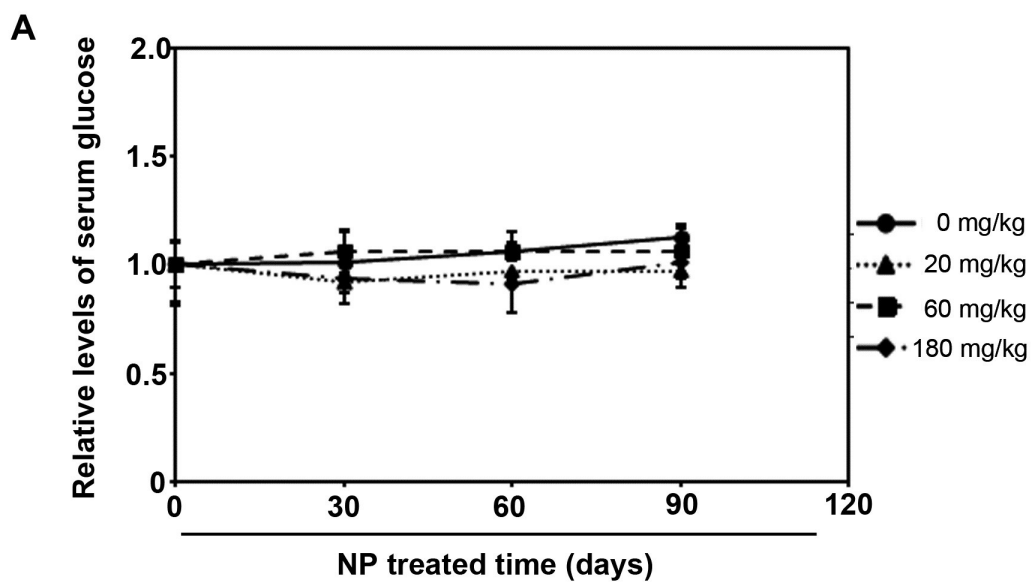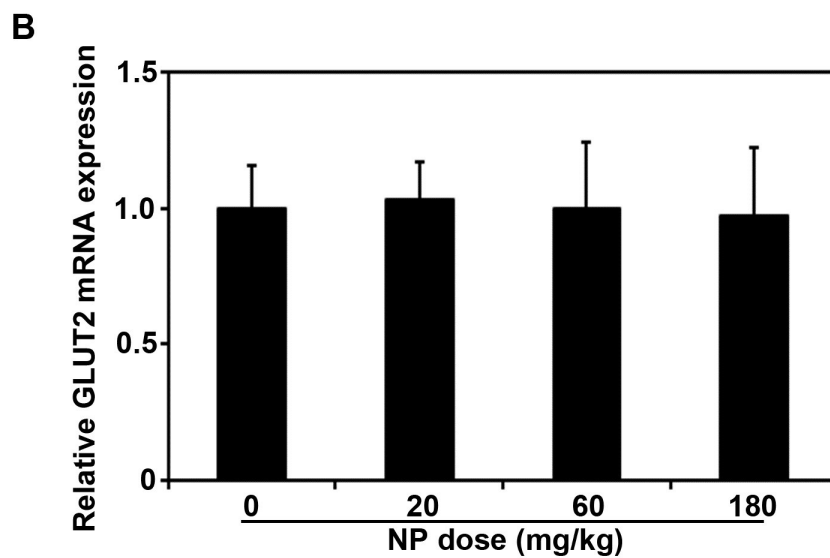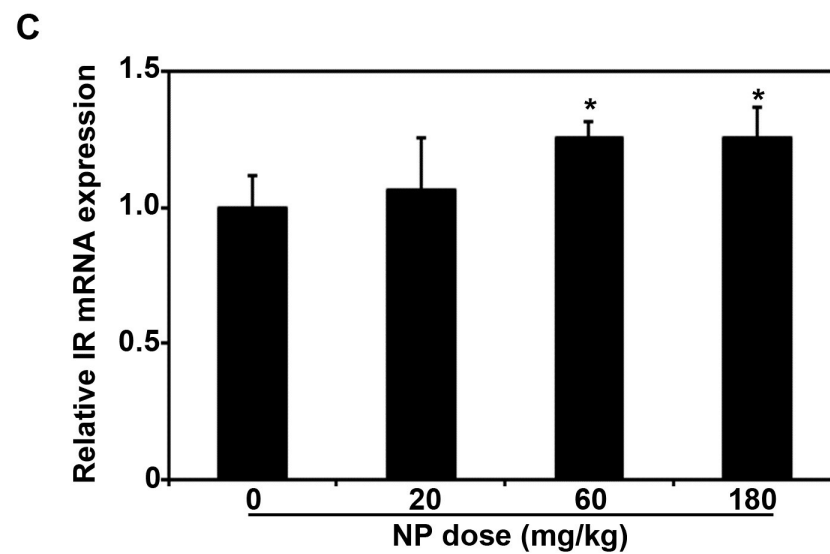

Supplement: c6tx00450d2.pdf [file c6tx00450d2.pdf]
